# Supplementary material for: Efficacy of intensity-modulated radiation therapy for optic nerve sheath meningioma
Source: Springer Nature journal article supplement (doi:10.1007/s00417-019-04424-w), 2019-08-03

# Case 1

before IMRT

after IMRT

final

Affected eye:  
Right

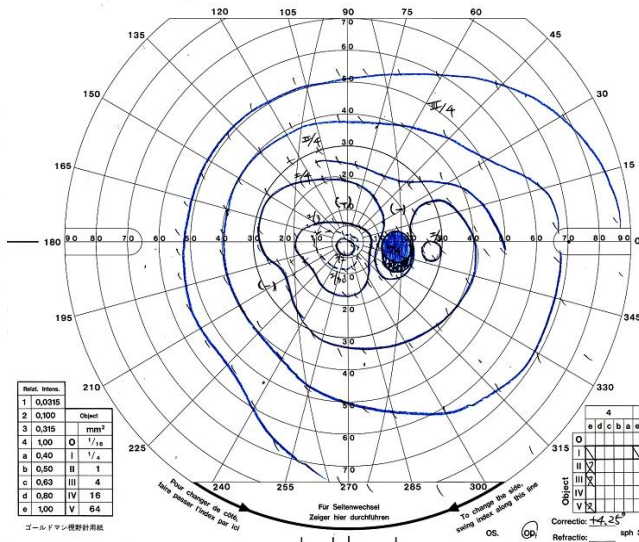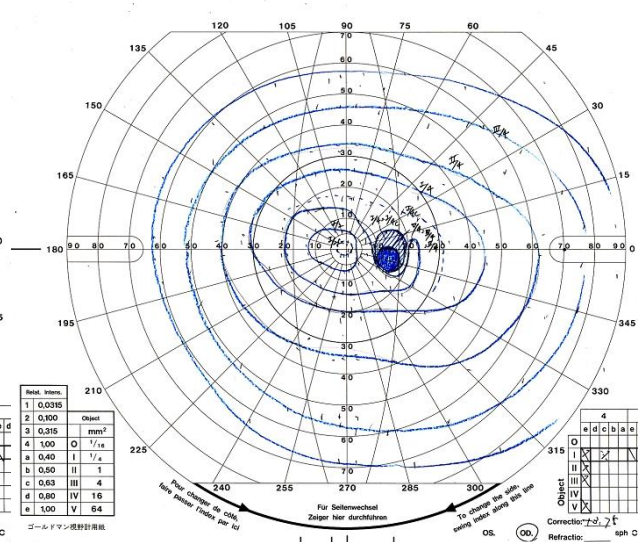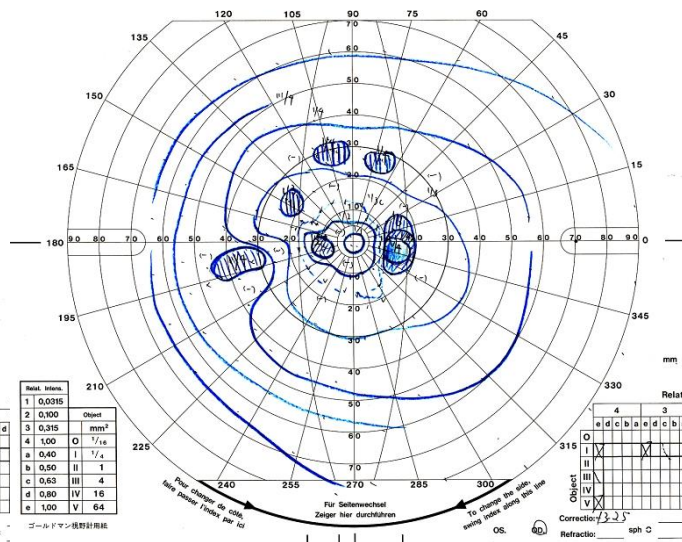

# Case 2

before IMRT

after IMRT

final

Affected eye:  
Left

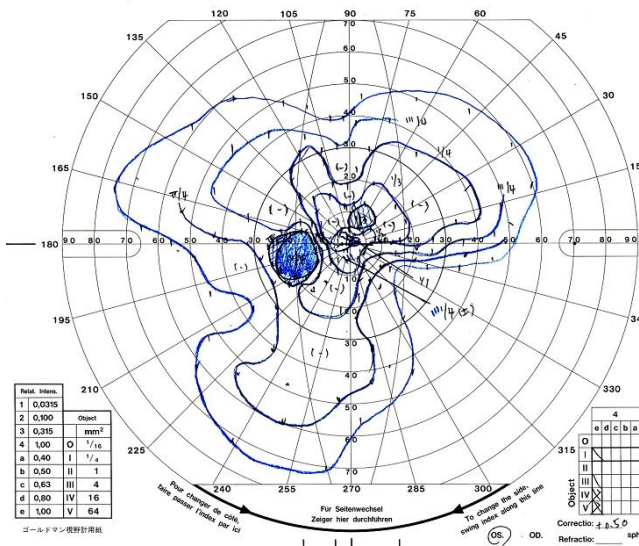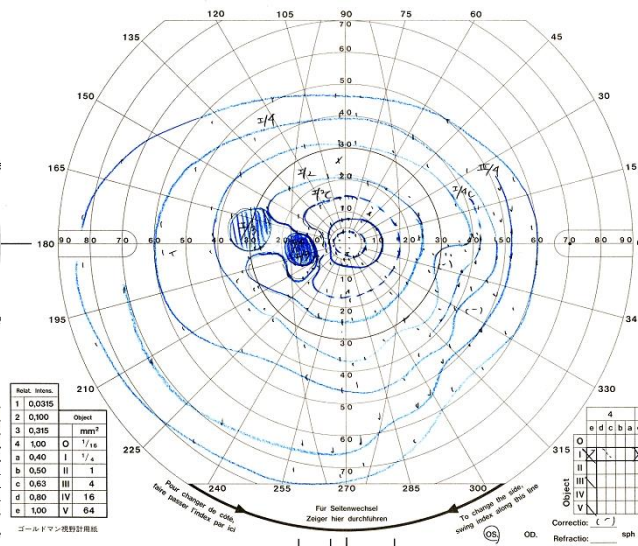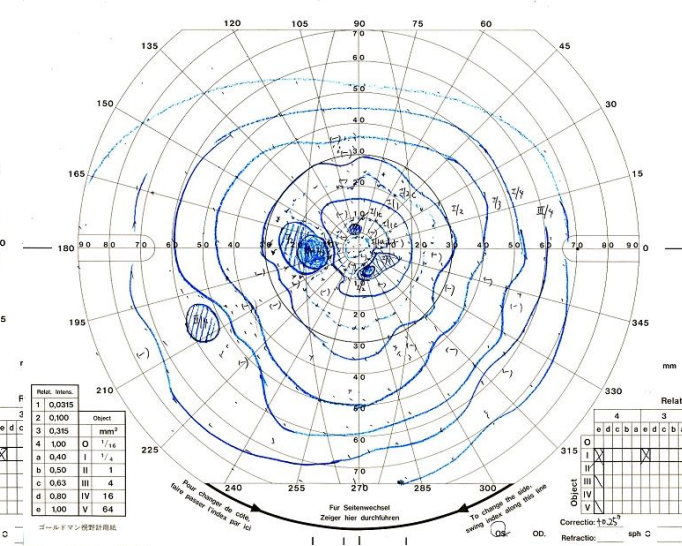



# Case 3

before IMRT

after IMRT

final

Affected eye:  
Right

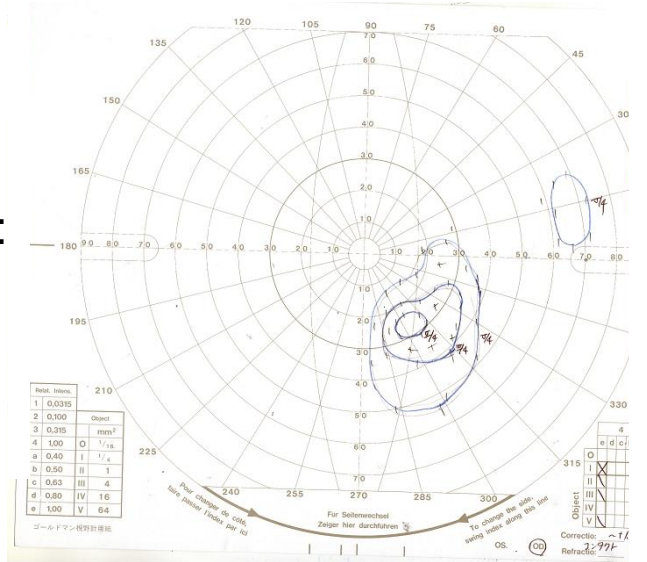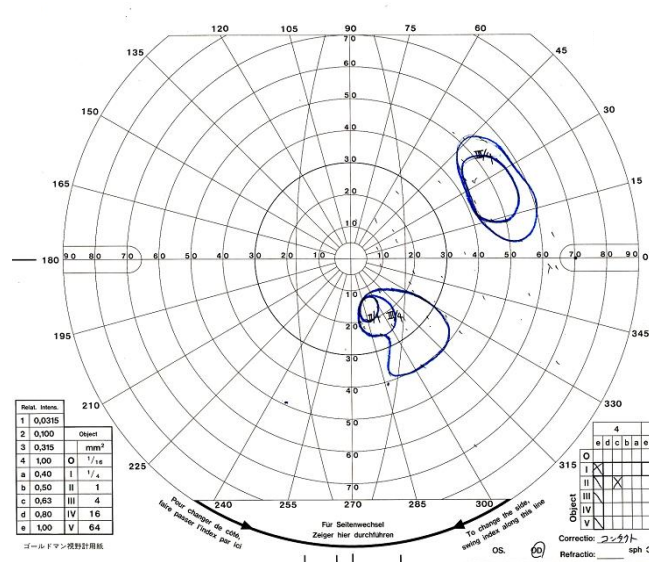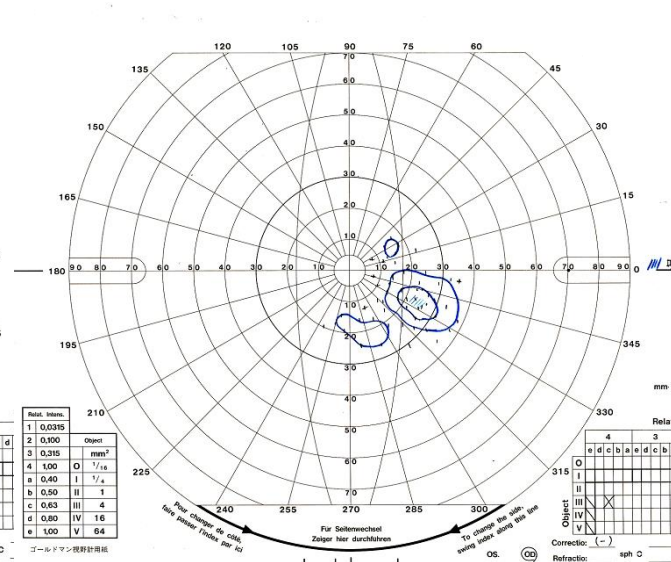

Fellow eye:  
Left

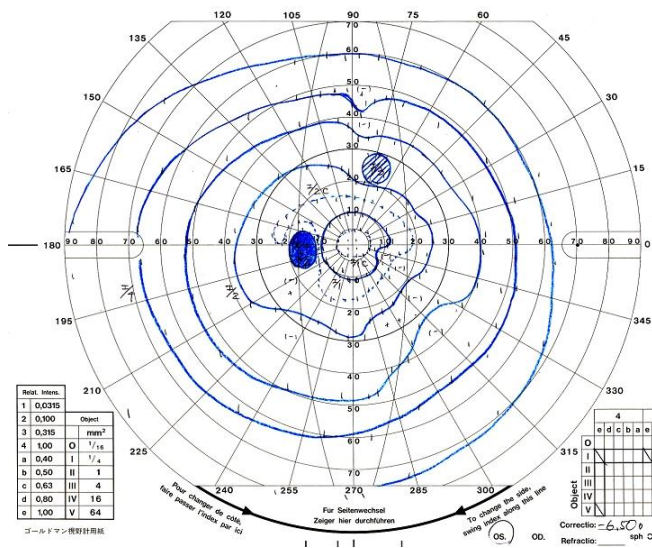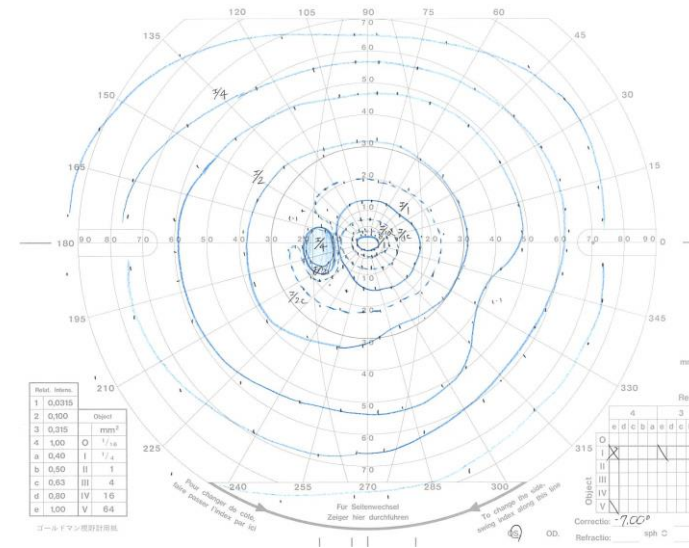



# Case 4

before IMRT

after IMRT

final

Affected eye:  
Left

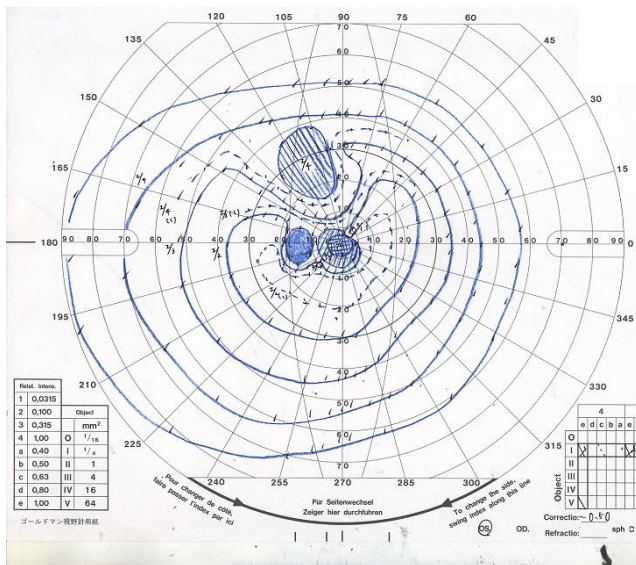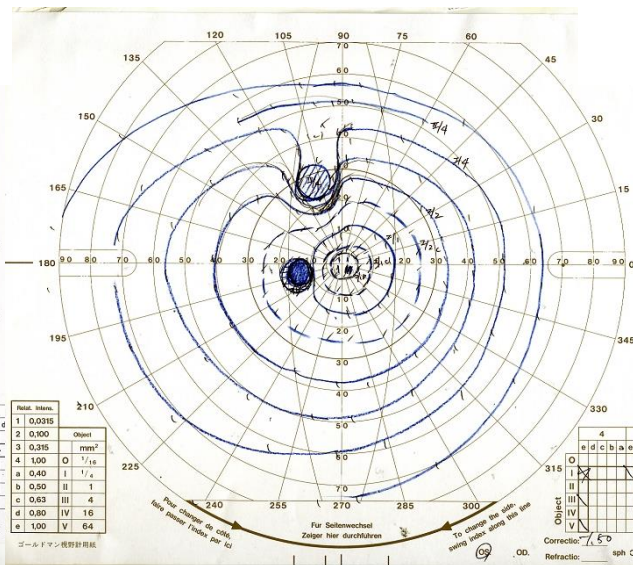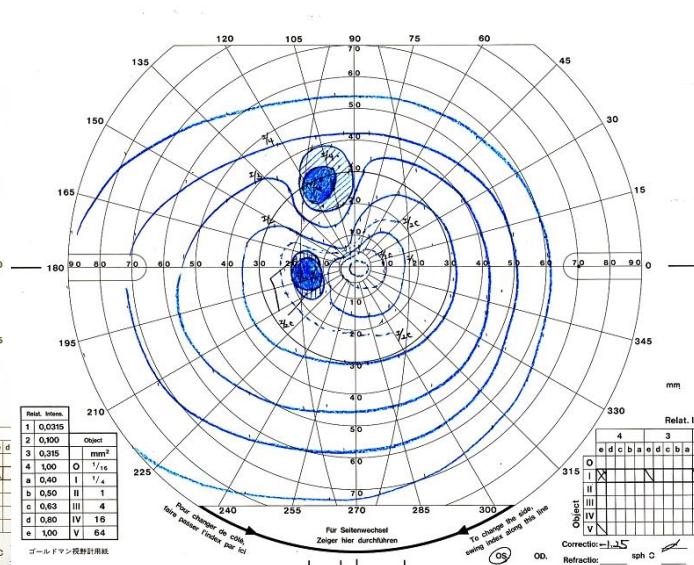

Fellow eye:  
Right

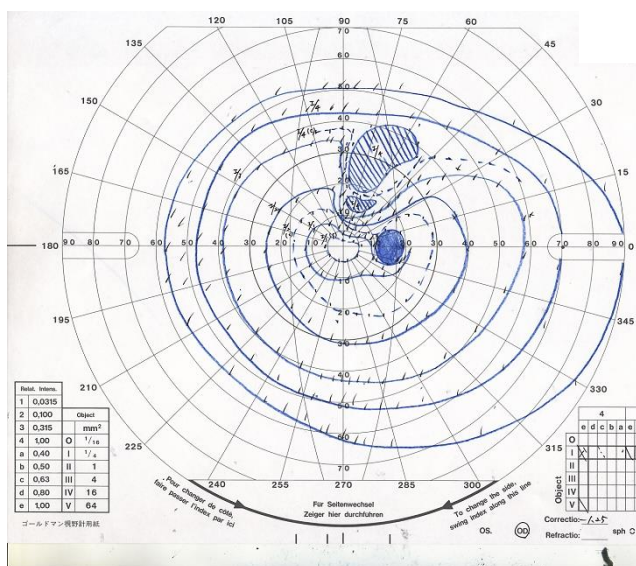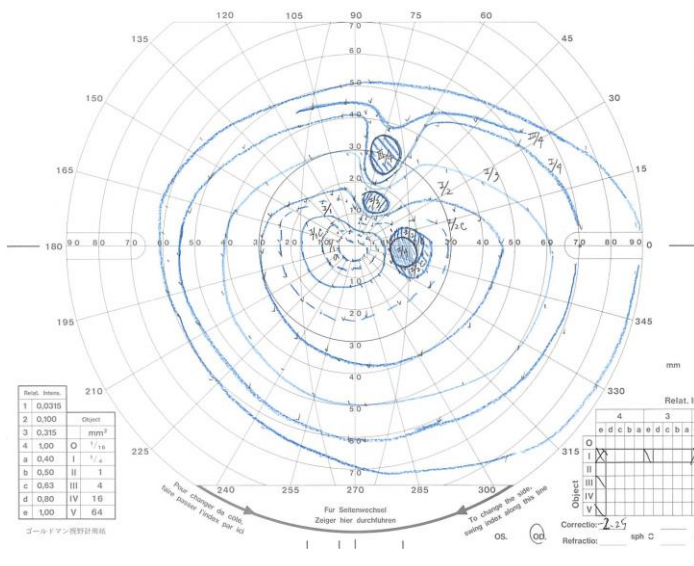



# Case 5

before IMRT

after IMRT

final

Affected eye:  
Right

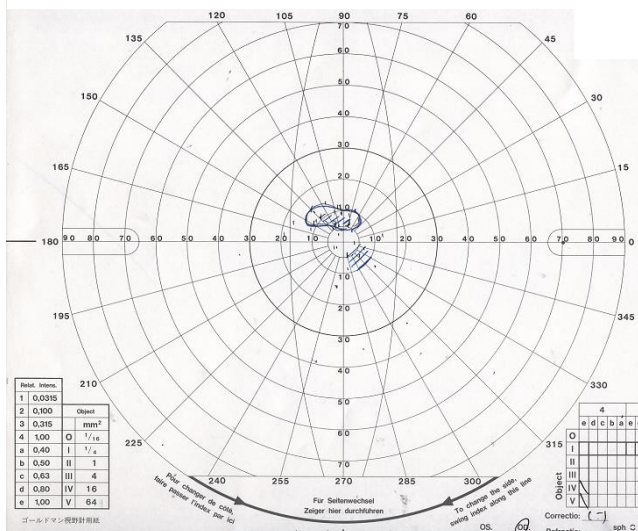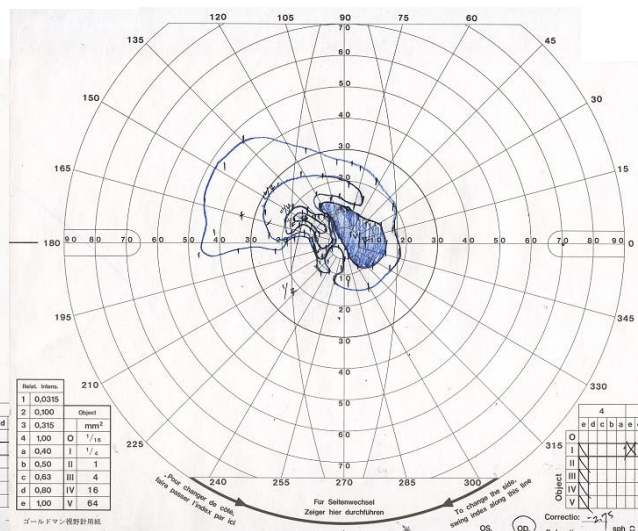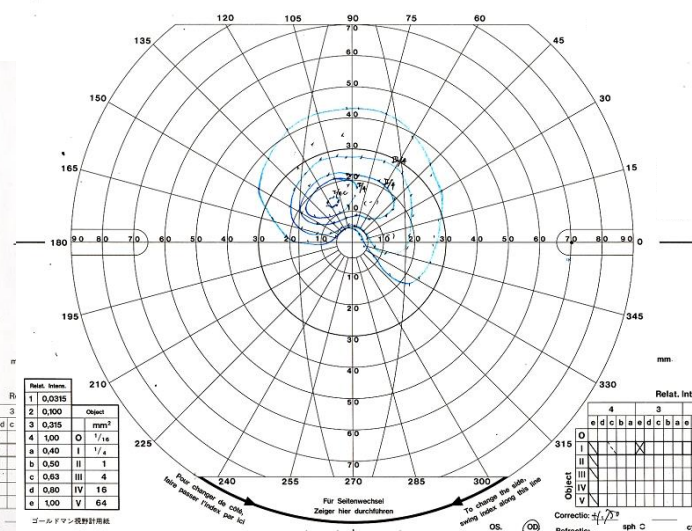

Fellow eye:  
Left

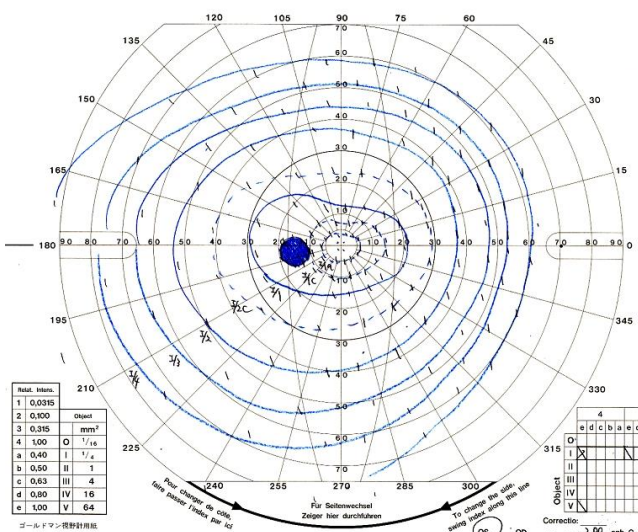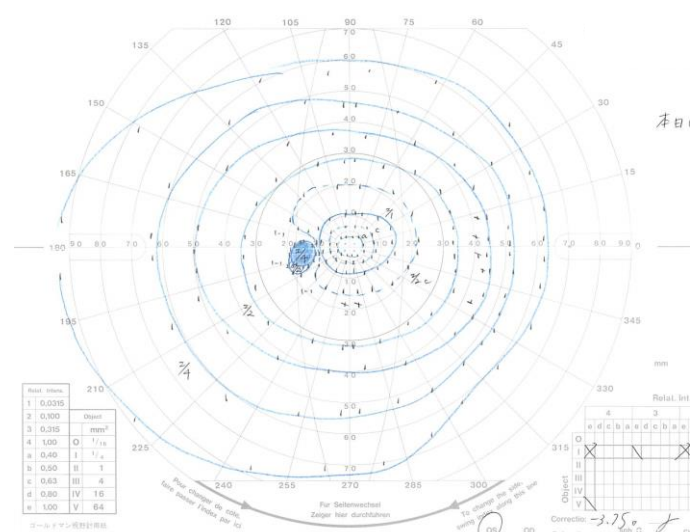

# Case 6

before IMRT

after IMRT

final

Affected eye:  
Right

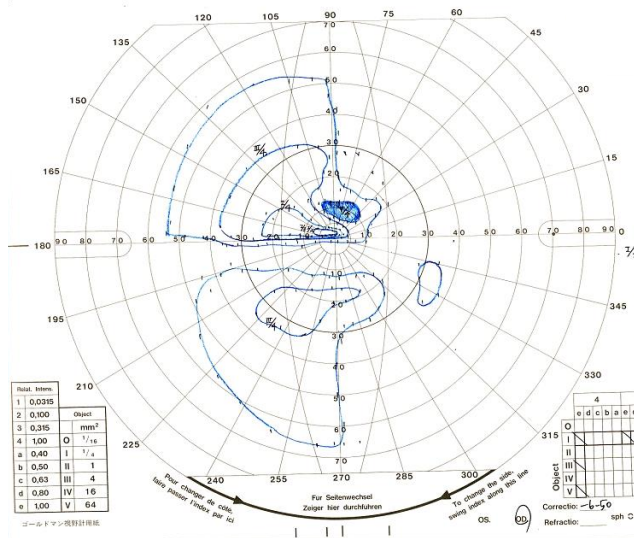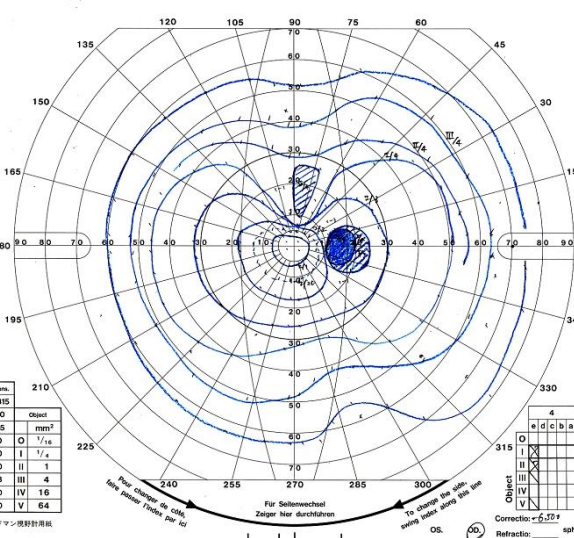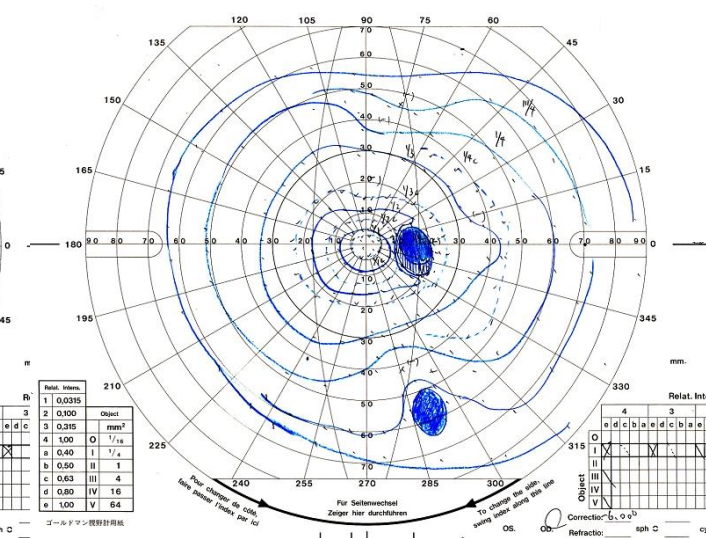

# Case 7

before IMRT

after IMRT

final

Affected eye:  
Right

NLP

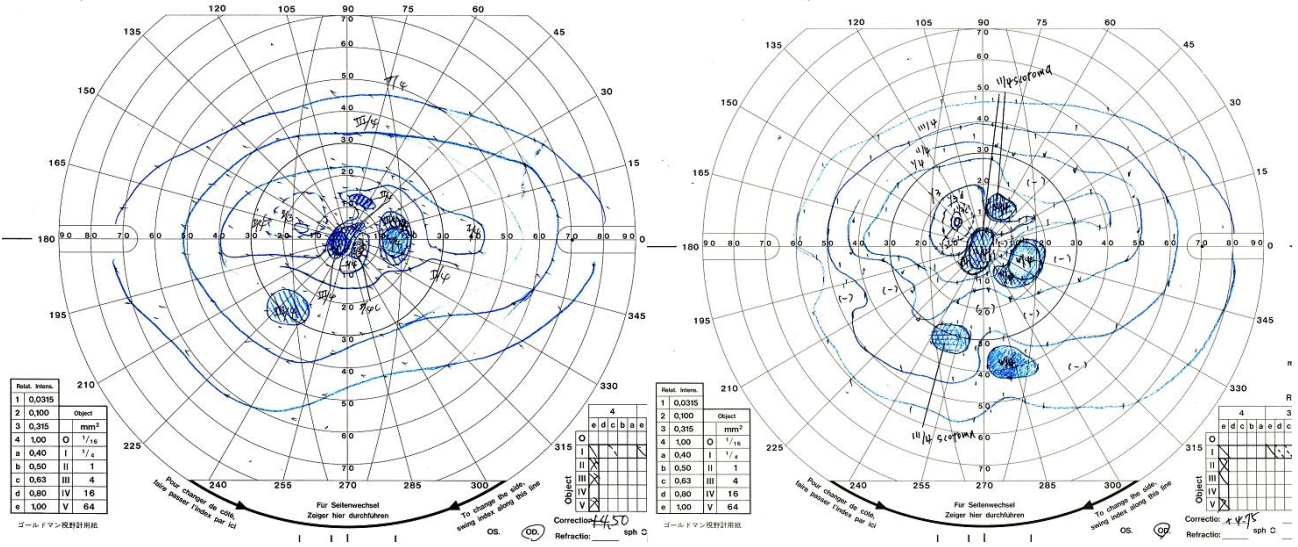



# Case 8

before IMRT

after IMRT

final

Affected eye:  
Left

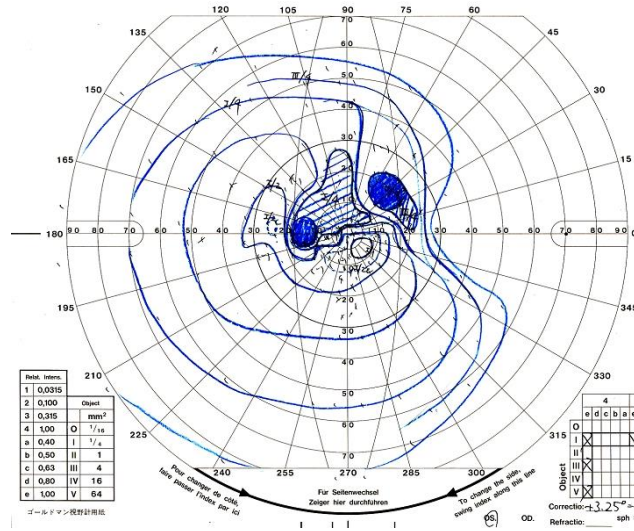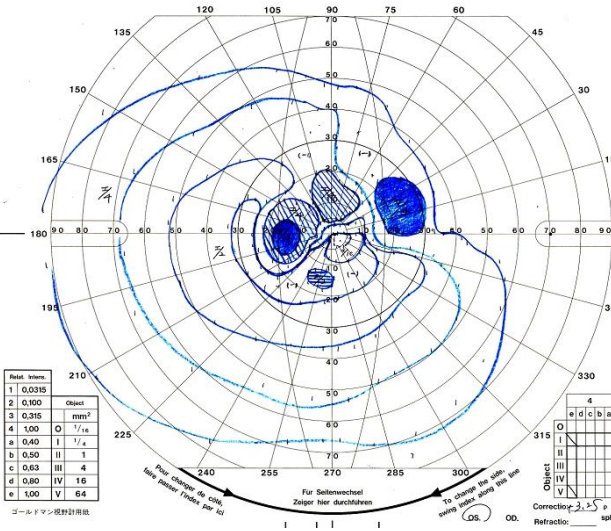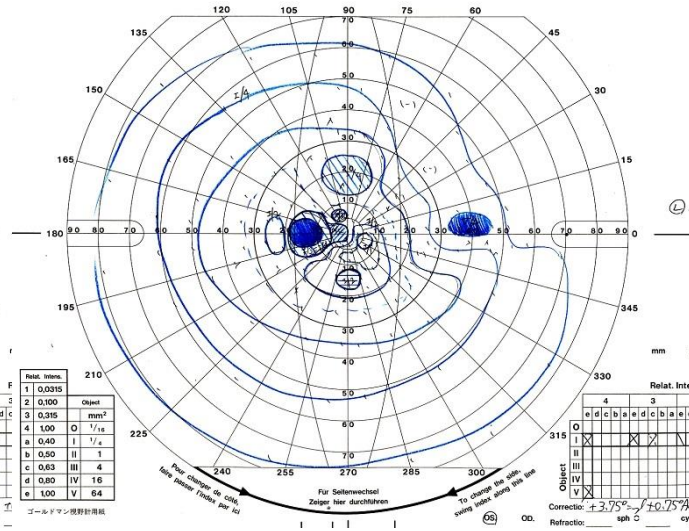

Fellow eye:  
Right

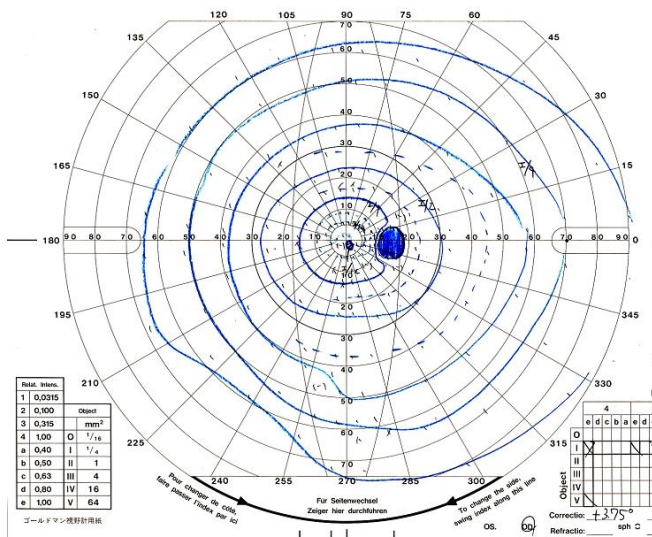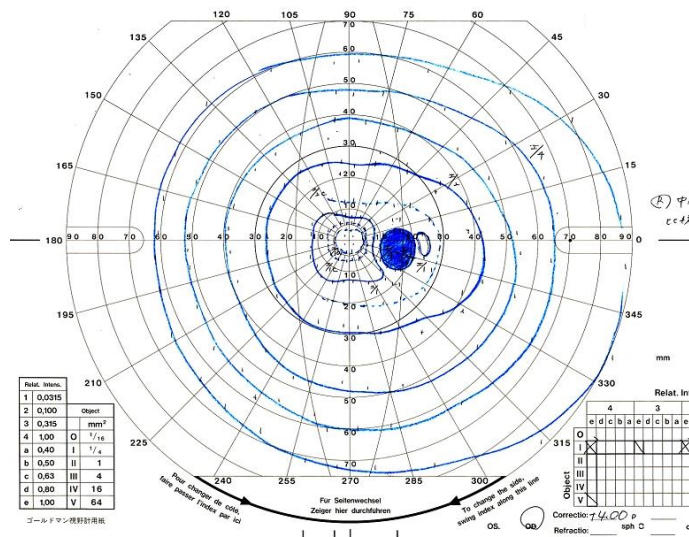



# Case 9

before IMRT

after IMRT

final

Affected eye:  
Left

no data

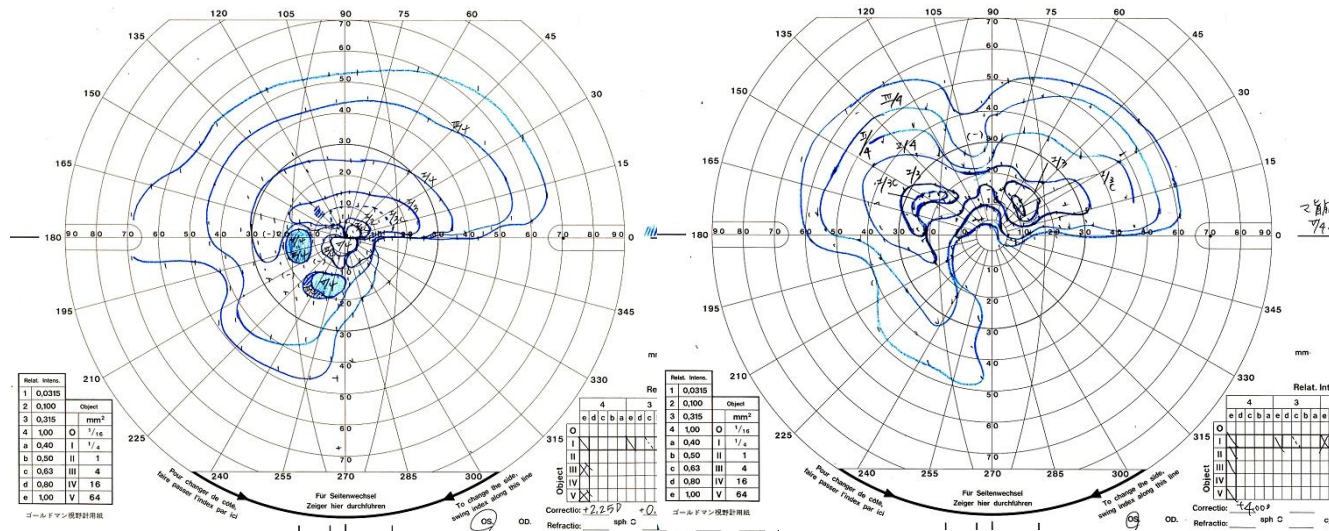

# Case 10

before IMRT

after IMRT

final

Affected eye:  
Left

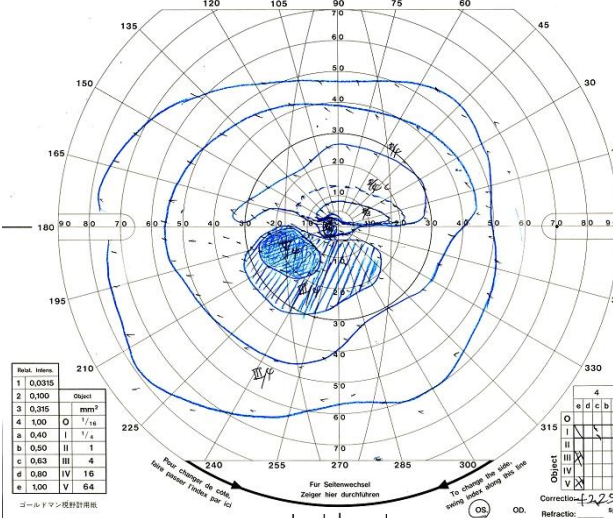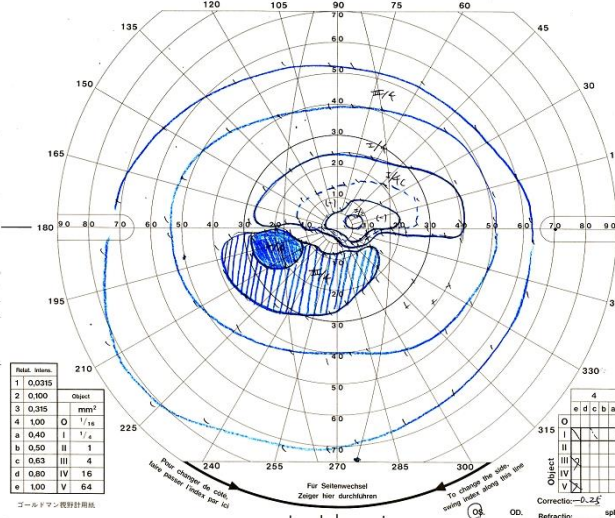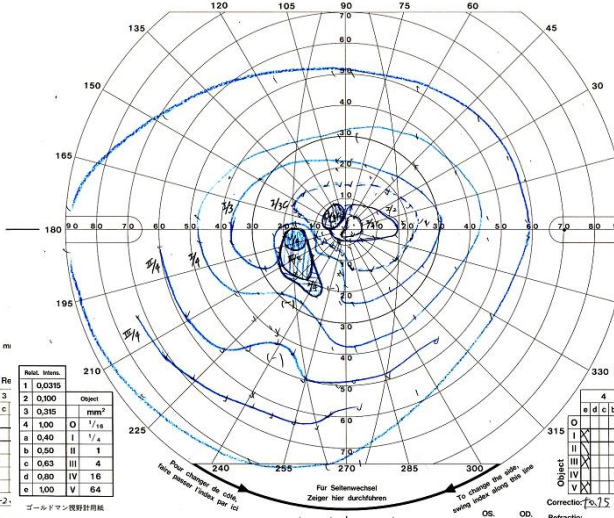



# Case 11

before IMRT

after IMRT

final

Affected eye:  
Left

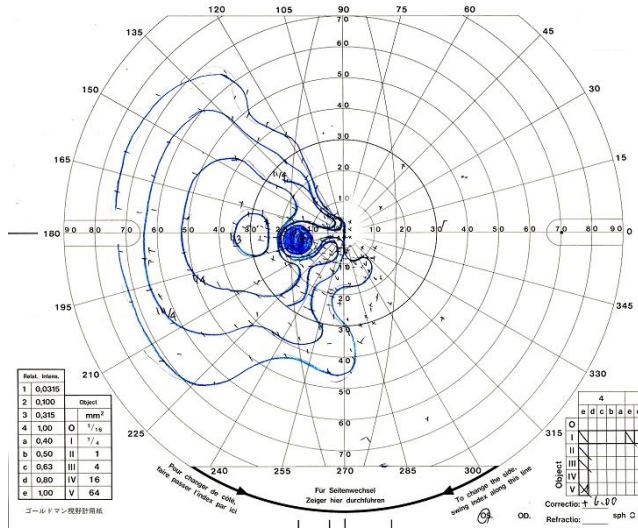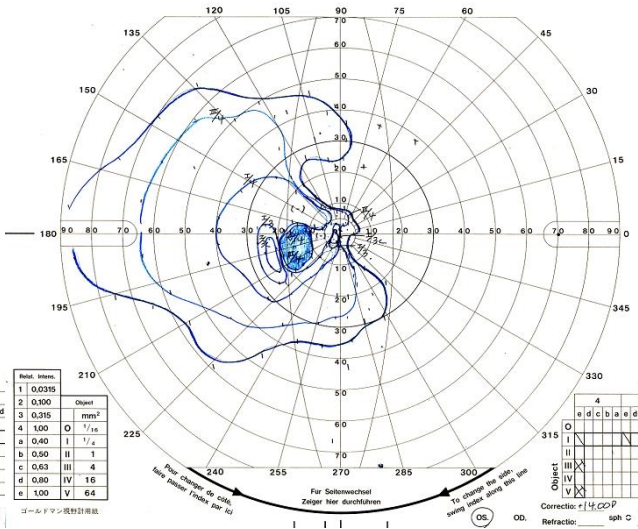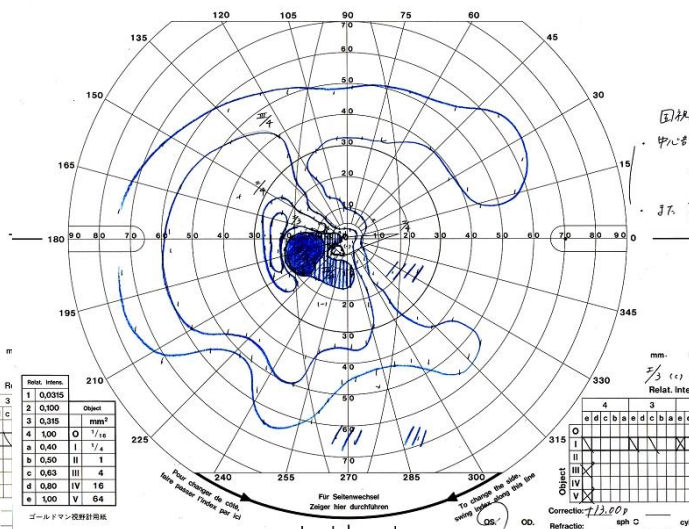

# Case 12

before IMRT

after IMRT

final

Affected eye:  
Right

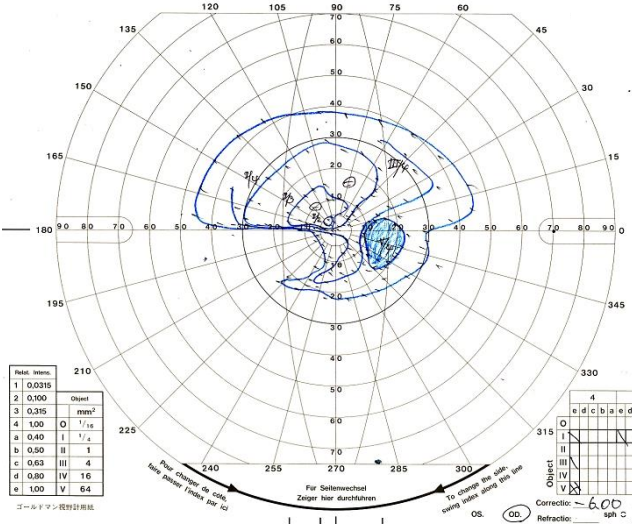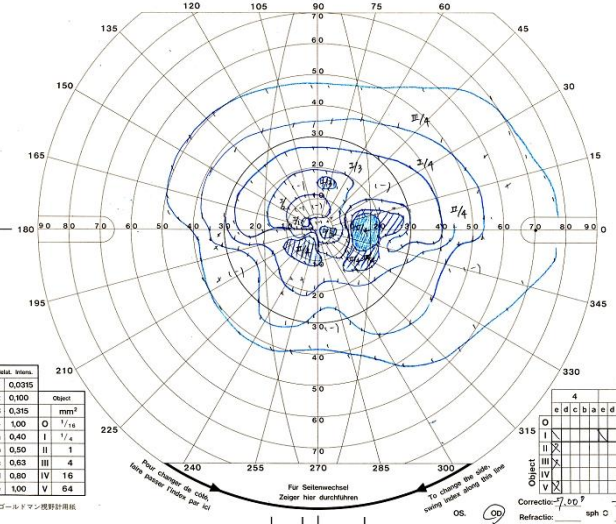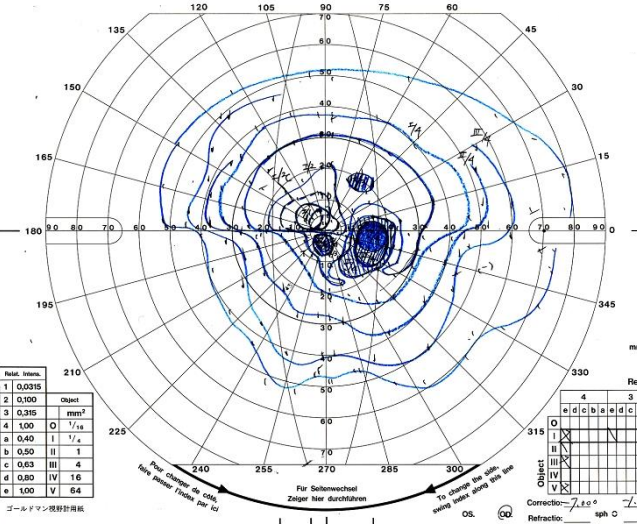

Fellow eye:  
Left

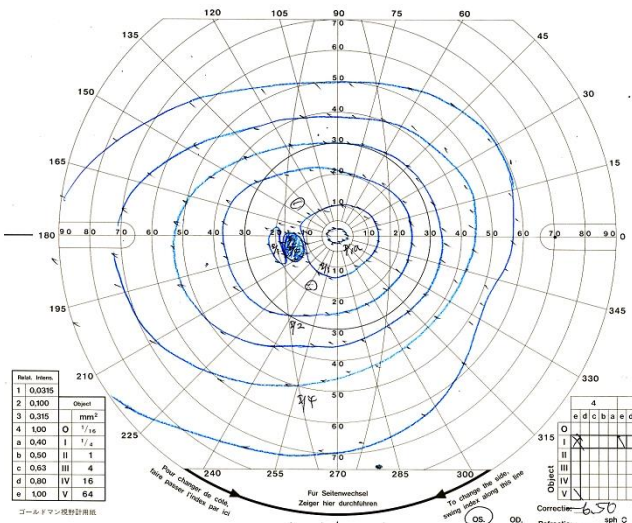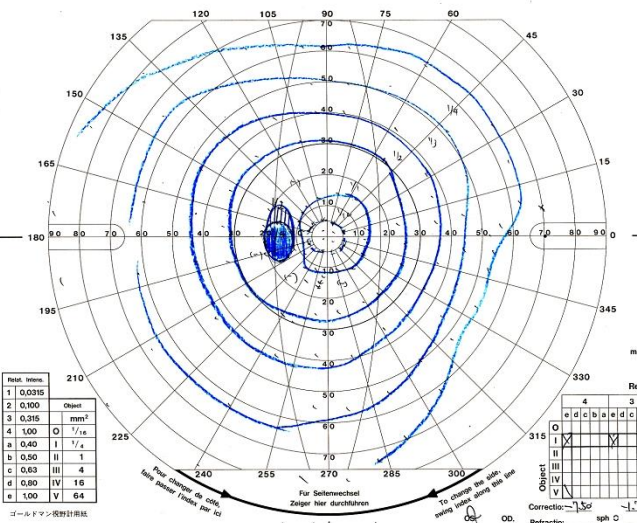



# Case 13

before IMRT

after IMRT

final

Affected eye:  
Left

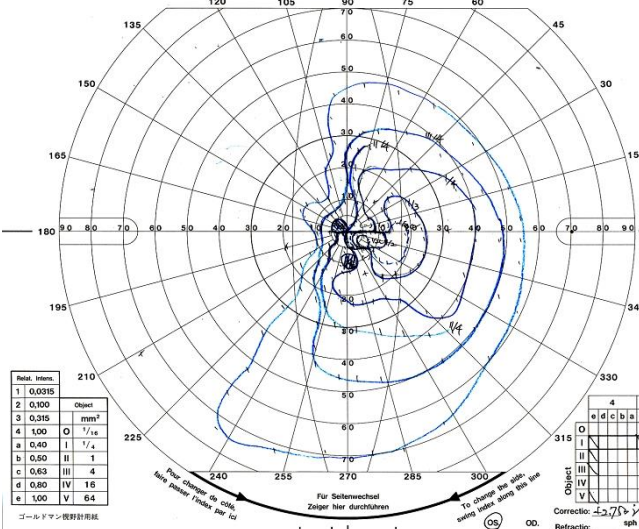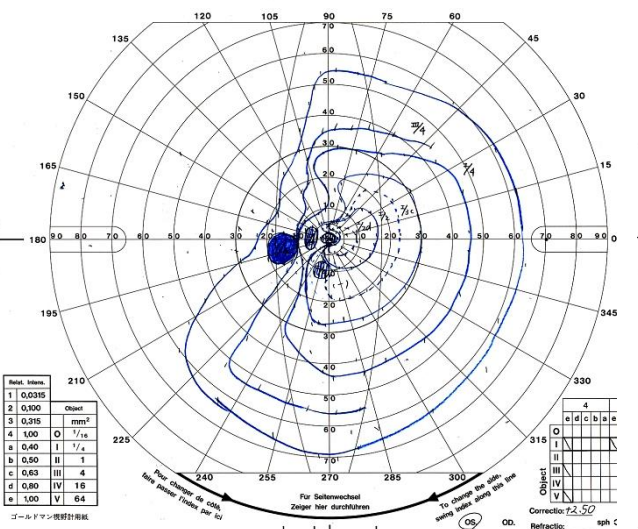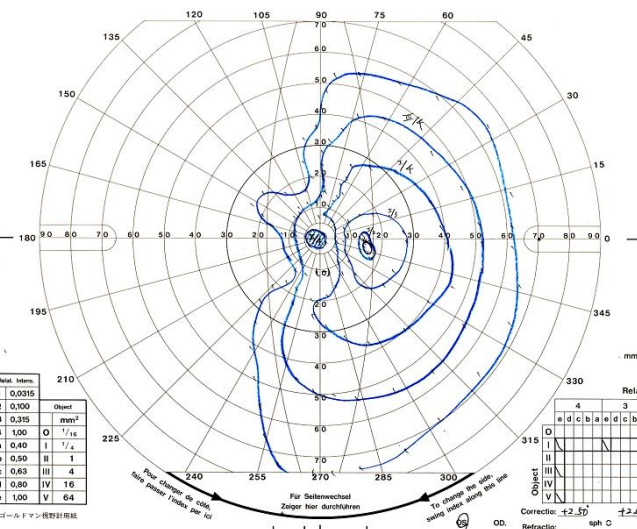

# Case 14

before IMRT

after IMRT

final

Affected eye:  
Right

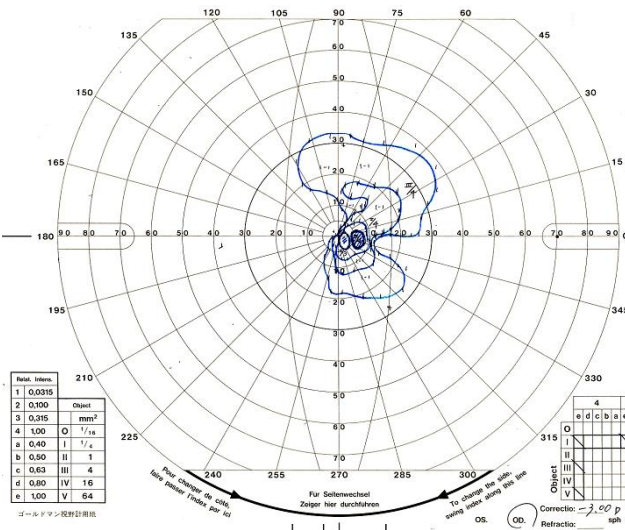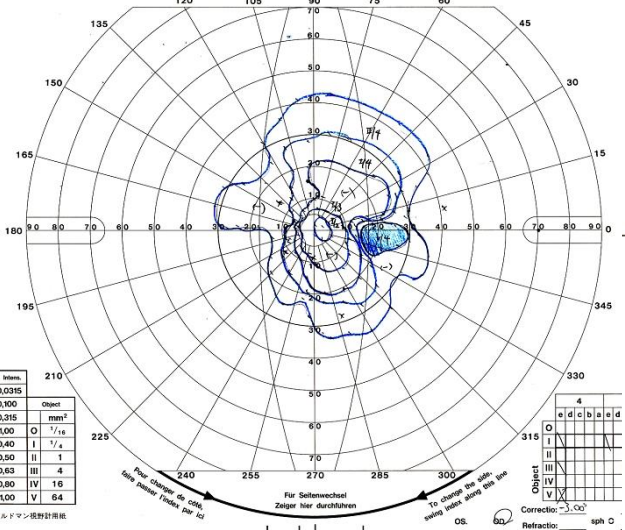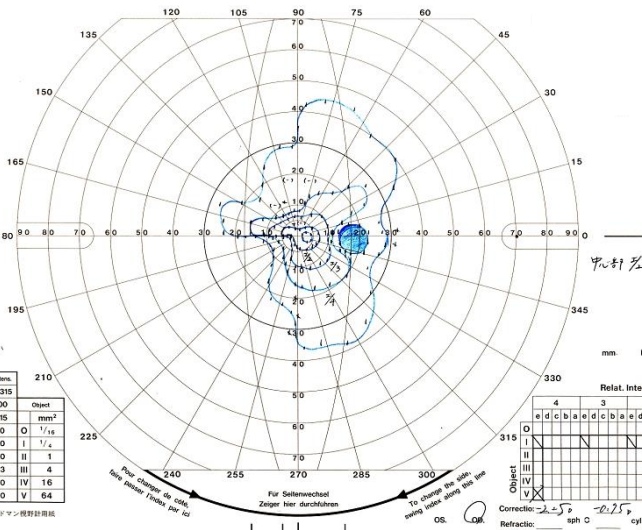



# Case 15

before IMRT

after IMRT

final

Affected eye:  
Right

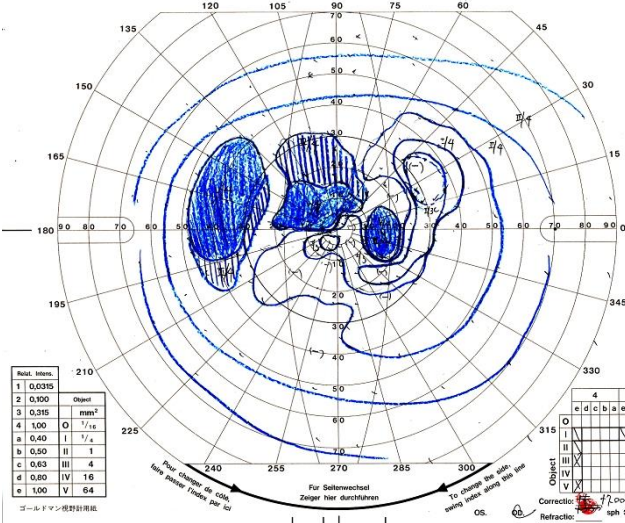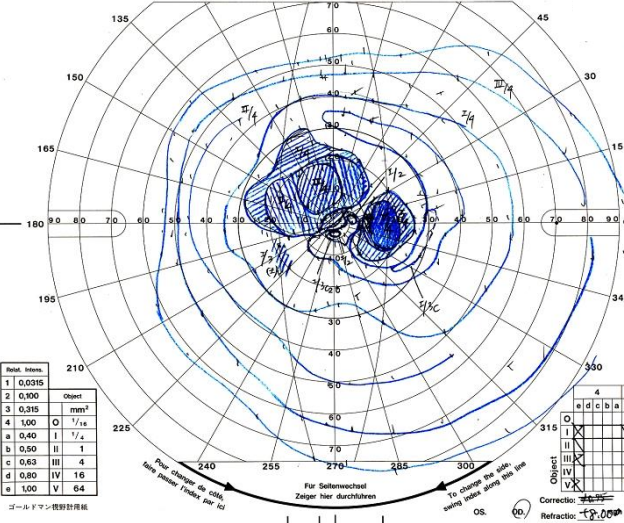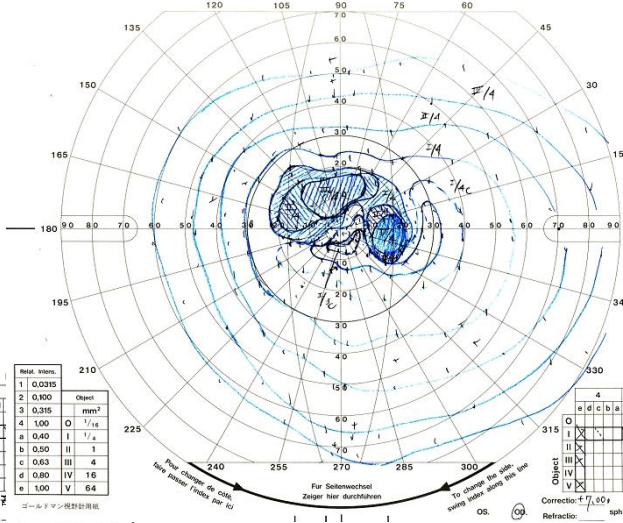

Supplement: MOESM2 [file 17036736]
